# Supplementary material for: Characterization of the natural enemy community attacking cotton aphid in the Bt cotton ecosystem in Northern China
Source: PubMed Central journal article supplement (PMC4831012; doi:10.1038/srep24273), 2016-04-14

1 **Characterization of the natural enemy community attacking cotton aphid in the**  
2 **Bt cotton ecosystem in northern China**

3

4 Abid Ali<sup>1</sup>, Nicolas Desneux<sup>2</sup>, Yanhui Lu<sup>1</sup>, Bing Liu<sup>1,3</sup>, Kongming Wu<sup>1\*</sup>

5

6 <sup>1</sup> State Key Laboratory for Biology of Plant Diseases and Insect Pests, Institute of  
7 Plant Protection, Chinese Academy of Agricultural Sciences, Beijing 100193, P.R.  
8 China.

9

10 <sup>2</sup> INRA (French National Institute for Agricultural Research), Univ. Nice Sophia  
11 Antipolis, CNRS, UMR 1355-7254, Institut Sophia Agrobiotech, 06903, Sophia  
12 Antipolis, France.

13

14 <sup>3</sup> College of Horticulture and Plant Protection, Yangzhou University, Yangzhou,  
15 225009, China.

16

17 **\* Corresponding author:**

18 Kongming Wu,

19 Email: [wukongming@caas.cn](mailto:wukongming@caas.cn); [kmwu@ippcaas.cn](mailto:kmwu@ippcaas.cn)

20 Tel: +86(0)1082105551

21 Mailing address: State Key Laboratory for Biology of Plant Diseases and Insect Pests.

22 Institute of Plant Protection, Chinese Academy of Agricultural Sciences, Beijing



## Supplementary Information

24

25

### 26 **Figure Legends**

27

#### 28 **Figure S1: Design of surveys in field cages experimental cotton during 2011, 2012**

29 **and 2013.** Design of the three treatments, i.e. natural enemy exclusion degree, in the  
30 field study; Exclusion cage: excluded all natural enemies (predators and parasitoid  
31 aphids) and fully protected aphids, Restriction cage: prevented predator movement  
32 but allowed aphid parasitoids to enter in the cages, Open field cage: allowed free  
33 access to the plants for all natural enemies. Three blocks each of 13 m x 15 m (and 2-  
34 m buffer surrounding the blocks), among 18 surveyed cages/plots per block (1-m  
35 between two plots) and each plot having 10 plants.

#### 36 **Figure S2: Design of surveys in open field cotton during 2011, 2012 and 2013.**

37 Three blocks each of 16 m x 15 m (and 2-m buffer surrounding the blocks), 20  
38 surveyed fixed plots per block (1-m between two plots).

#### 39 **Figure S3: Comparison of seasonal mean population density ( $\pm$ SEM) of (a) cotton**

40 aphids, (b) coccinellids, (c) chrysopids, (d) anthocorids, (e) spiders and (f) aphid  
41 parasitoids (mummies) per 100 plants surveyed during three cotton growth stages; (i)  
42 early plant stage (May-June), (ii) middle plant stage (July), and (iii) late plant stage  
43 (August- September) from end of May to early September in the open cotton field for  
44 three growing seasons; 2011, 2012 and 2013 in Langfang experimental station  
45 (Yellow River Region of China). Black = late stage, Gray = middle stage, white =  
46 early stage. Lines are SEMs. Means with the same letter across growth stages are not  
47 significantly different (Student-Neuman-Keuls means separation test,  $\alpha = 0.05$ ).

48 **Figure S1:**

49

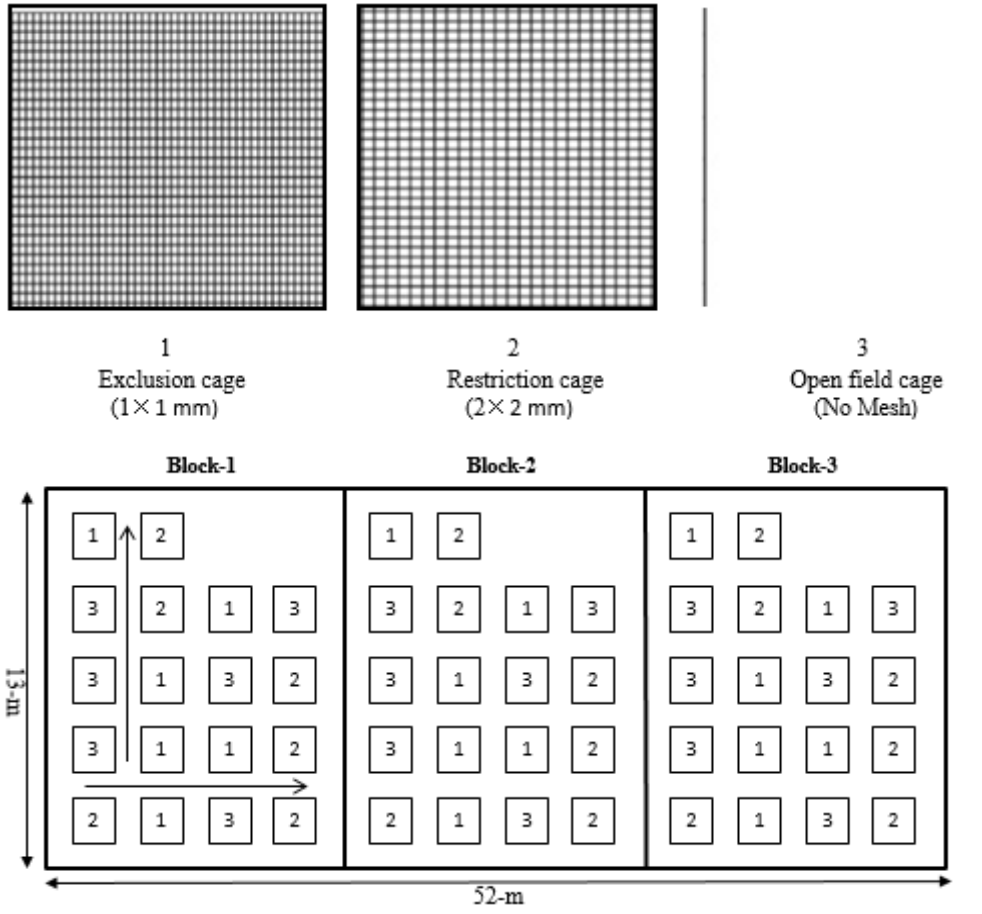

50

51

52 **Figure S2:**

53

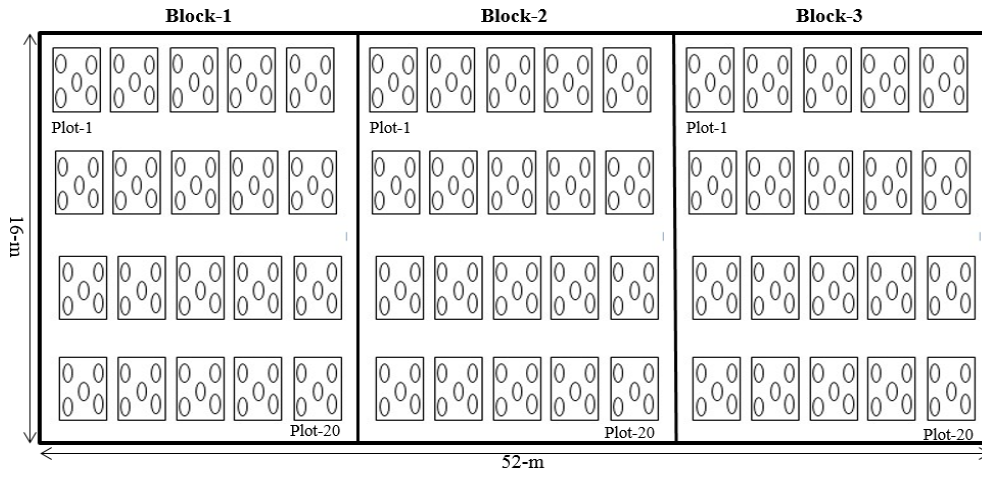

54

**Figure S3:**

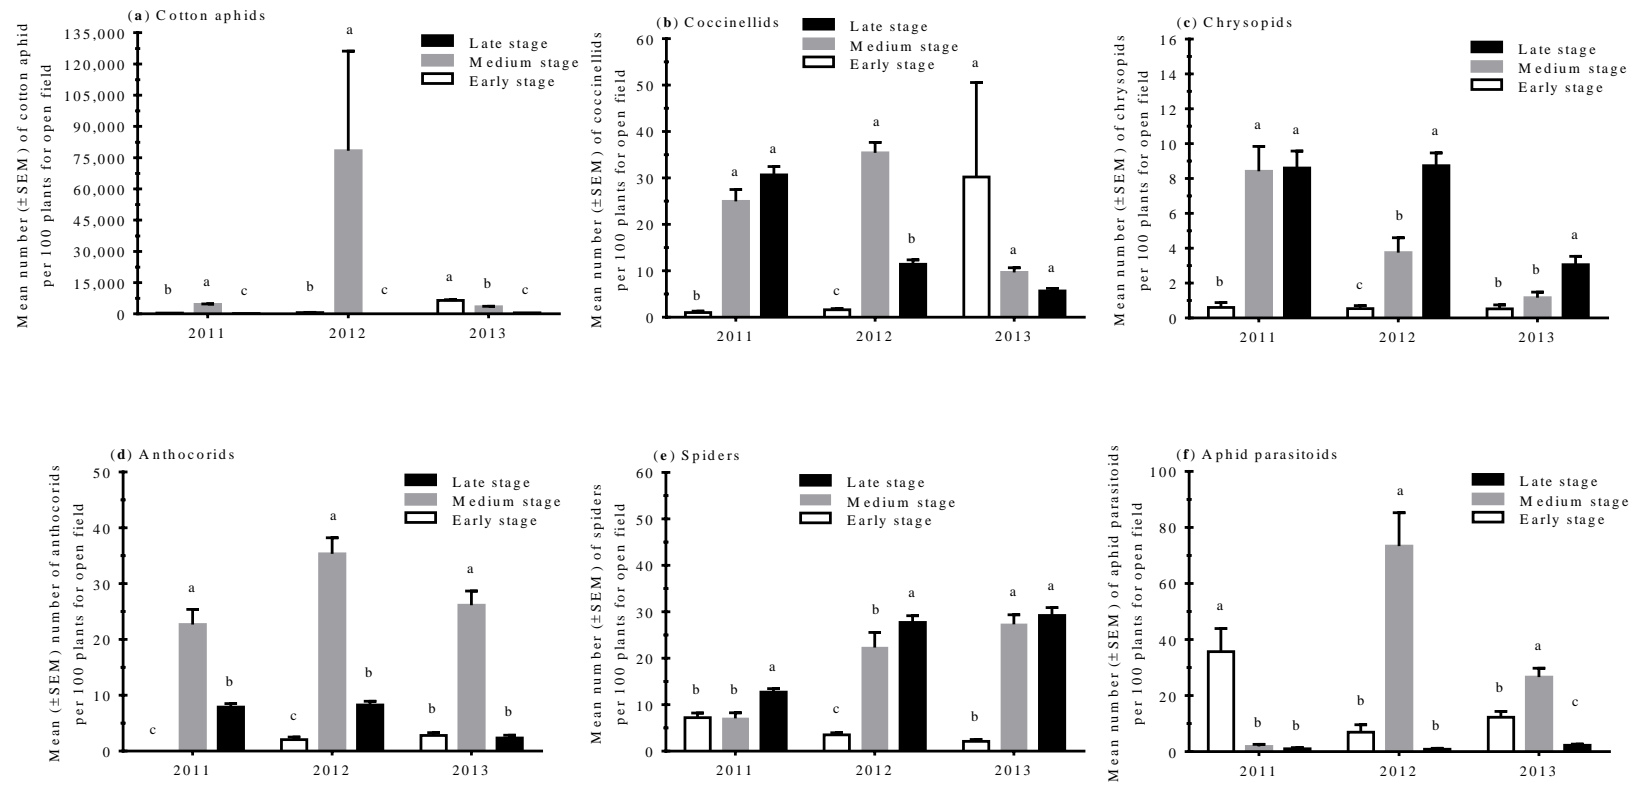

Supplement: srep24273-s1.pdf [file srep24273-s1.pdf]
